# Supplementary material
Source: PubMed Central journal article supplement (PMC8557123)
Supplement: NIHMS1732425-supplement-1732425_Online_Resource_1.pdf [file NIHMS1732425-supplement-1732425_Online_Resource_1.pdf]

### Online Resource 1: Microarray full disclosure

| Case Number | Age at Admission (Days) | Disease Classification                      | STAT Mortality Category | RACHS Risk Category | Microarray Result                                                                                 |
|-------------|-------------------------|---------------------------------------------|-------------------------|---------------------|---------------------------------------------------------------------------------------------------|
| 1           | 12                      | Ventricular Septal Defect                   | 2                       | -                   | arr[GRCh37] 1q21.3q22(154,423,702-156,450,611)x1                                                  |
| 2           | 132                     | Ventricular Septal Defect                   | 1                       | 2                   | arr[GRCh37] 15q15.3(43,837,620-43,983,895)x1<br>arr[GRCh37] 22q12.3q13.1(34,779,552-38,569,191)x1 |
| 3           | 265                     | Truncus Arteriosus                          | -                       | -                   | arr[hg19] 5q32(146,368,086-149,005,860)x3                                                         |
| 4           | 306                     | Truncus Arteriosus                          | -                       | -                   | arr[hg19] 22q11.21(18,722,650-21,755,261)x1                                                       |
| 5           | 12                      | Truncus Arteriosus                          | 4                       | 4                   | arr[hg19] 22q11.21(18,916,842-21,465,659)x1                                                       |
| 6           | 0                       | Transposition of the Great Arteries         | 3                       | 3                   | arr[hg19] 22q11.1(16,197,005-17,603,331)x3-4                                                      |
| 7           | 3                       | Total Anomalous Pulmonary Venous Connection | -                       | -                   | arr [hg19] 22q11.1q11.21(16,778,580-18,645,839)x3                                                 |
| 8           | 143                     | Tetralogy of Fallot                         | 1                       | 2                   | arr[hg19] 16p13.3(144,832-515,227)x1                                                              |
| 9           | 6                       | Tetralogy of Fallot                         | -                       | -                   | arr[hg19] 1q22(155,716,122-155,916,544)x3                                                         |
| 10          | 17                      | Tetralogy of Fallot                         | 4                       | 3                   | arr[GRCh37] 1q21.1q21.2(146,945,672-147,381,145)x3                                                |
| 11          | 193                     | Tetralogy of Fallot                         | 1                       | 2                   | arr (X)x1, (Y)x2                                                                                  |
| 12          | 206                     | Tetralogy of Fallot                         | 1                       | 2                   | arr[GRCh37] 1q21.1q21.2(146,420,990-148,782,120)x3                                                |
| 13          | 0                       | Shone Complex                               | 1                       | 2                   | arr[hg19] 13q12.11q12.12(23,092,245-25,041,770)x3                                                 |
| 14          | 253                     | Pulmonary Stenosis                          | -                       | -                   | arr[hg19] 1q41(218,264,238-218,541,962)x3                                                         |
| 15          | 138                     | Pulmonary Stenosis                          | -                       | -                   | arr[hg19] 1p35.3p35.2(29,957,123-30,860,133)x1                                                    |
| 16          | 2                       | Pulmonary Hypertension                      | -                       | -                   | arr[hg19] Xq22.3(107,780,190-108,289,437)x2                                                       |
| 17          | 0                       | Pulmonary Atresia                           | -                       | -                   | arr[hg19] 22q11.21(18,651,748-21,637,262)x1                                                       |
| 18          | 0                       | Pulmonary Atresia                           | 4                       | 3                   | arr[hg19] Xq26.2(131,942,553-132,603,622)x3                                                       |
| 19          | 1                       | Pulmonary Atresia                           | 4                       | 3                   | arr[hg19] 6q12(65,343,118-65,844,540)x3                                                           |
| 20          | 94                      | Pulmonary Atresia                           | 4                       | 3                   | arr[GRCh37] 6q25.3(158,210,792-158,822,111)x3                                                     |
| 21          | 0                       | Pulmonary Atresia                           | 4                       | 3                   | arr[GRCh37] 11q24.2q25(124,723,867-135,006,516)x3<br>14q32.33(104,133,013-107,349,540)x1          |
| 22          | 5                       | Interrupted Aortic Arch                     | 4                       | 4                   | arr[hg19] 15q11.2(22,297,051-23,673,384)x1<br>22q11.21(18,644,901-21,575,467)x1                   |
| 23          | 0                       | Interrupted Aortic Arch                     | 4                       | 4                   | arr[hg19] 4p16.3(0-3,751,279)x1                                                                   |
| 24          | 0                       | Interrupted Aortic Arch                     | 4                       | 4                   | arr [hg19] 22q11.21(18,683,887-21,575,467)x1                                                      |
| 25          | 144                     | Hypoplastic Left Heart Syndrome             | 2                       | 2                   | arr[hg19] 18q22.1(65,684,742-66,454,475)x3                                                        |

| Case Number | Age at Admission (Days) | Disease Classification                 | STAT Mortality Category | RACHS Risk Category | Microarray Result                                                                                                                                                  |
|-------------|-------------------------|----------------------------------------|-------------------------|---------------------|--------------------------------------------------------------------------------------------------------------------------------------------------------------------|
| 26          | 0                       | Hypoplastic Left Heart Syndrome        | 5                       | 6                   | arr[hg19] 1q23.3(161,108,268-161,395,548)x3                                                                                                                        |
| 27          | 0                       | Hypoplastic Left Heart Syndrome        | 5                       | 6                   | arr[hg19] 7q11.23(72,688,285-74,161,142)x3                                                                                                                         |
| 28          | 0                       | Hypoplastic Left Heart Syndrome        | 5                       | 3                   | arr[hg19] 15q11.2(22,628,639-23,178,762)x1                                                                                                                         |
| 29          | 0                       | Hypoplastic Left Heart Syndrome        | 5                       | 3                   | arr[hg19] 7q11.21(66,100,820-66,138,197)x3                                                                                                                         |
| 30          | 48                      | Hypoplastic Left Heart Syndrome        | 2                       | 3                   | arr[hg19] 22q11.21(18,916,828- 21,465,659)x1                                                                                                                       |
| 31          | 0                       | Ebstein anomaly                        | -                       | -                   | arr[hg19] 5p15.31(18,341,330-19,185,065)x3                                                                                                                         |
| 32          | 3                       | Double Outlet Right Ventricle          | 4                       | -                   | arr[hg19] 8q11.22q11.23(52,412,114-52,887,045)x3                                                                                                                   |
| 33          | 0                       | Double Outlet Right Ventricle          | 4                       | 4                   | arr[hg19] 3p25.2(12,629,988-12,800,963)x3                                                                                                                          |
| 34          | 0                       | Double Outlet Right Ventricle          | 4                       | 3                   | arr[hg19] 20q13.12q13.33(44,723,970-63,025,520)x3                                                                                                                  |
| 35          | 0                       | Double Outlet Right Ventricle          | 4                       | 3                   | arr[hg19] 22q11.21(18,883,966-21,522,853)x1                                                                                                                        |
| 36          | 0                       | Double Outlet Right Ventricle          | -                       | -                   | arr[hg19] 16p11.2(28,497,756-28,498,146)x1                                                                                                                         |
| 37          | 1                       | Discontinuous Pulmonary Artery         | -                       | -                   | arr[GRCh37] 22q11.21(18,717,994-21,700,510)x1                                                                                                                      |
| 38          | 2                       | Coarctation of the Aorta               | 4                       | 3                   | arr[hg19] Xp22.2(10,822,879-11,335,835)x3                                                                                                                          |
| 39          | 287                     | Coarctation of the Aorta               | 1                       | 2                   | arr [hg19] 1q41q42.11(222,698,623-224,104,993)x1                                                                                                                   |
| 40          | 2                       | Coarctation of the Aorta               | 2                       | 2                   | arr[GRCh37] 22q11.21(18,644,901-21,699,215)x3                                                                                                                      |
| 41          | 0                       | Cardiomyopathy                         | -                       | -                   | arr[hg19] 7q11.21(66,100,820-66,138,197)x3                                                                                                                         |
| 42          | 2                       | Atrioventricular Septal Defect         | 2                       | 2                   | arr[hg19] 2p24.3(15,252,044-15,840,491)x3                                                                                                                          |
| 43          | 2                       | Aortic Stenosis                        | -                       | -                   | arr[hg19] 5q35.2q35.3(175, 454, 192-177,465,541)x3                                                                                                                 |
| 44          | 1                       | Aortic Stenosis                        | -                       | -                   | arr[hg19] 7q11.23(72,474,282-74,371,013)x1                                                                                                                         |
| 45          | 108                     | Aortic Stenosis                        | 3                       | 2                   | arr[hg19] 7q11.23(72,745,047-74,138,460)x1                                                                                                                         |
| 46          | 0                       | Aortic arch hypoplasia                 | -                       | -                   | arr[hg19] 22q13.1(40,756,659-40,776,565)x1                                                                                                                         |
| 47          | 1                       | Aortic arch hypoplasia                 | -                       | -                   | arr[hg19] Yp11.32q11.221(118,546-19,563,600)x1-2<br>Yq11.222q11.23(20,609,789-28,799,937)x0                                                                        |
| 48          | 334                     | Anomalous Pulmonary Origin of Coronary | 2                       | -                   | arr Xq26.3q28(134,510,633-155,233,731)x1<br>12p12.2p12.1(21,007,731-21,416,413)x1<br>15q11.2(22,770,421-24,463,844)x1<br>15q11.2q21.1(22,752,398-45,938,661)x2 hmz |

x0 = Zero copies (deletion); x1 = 1 copy (deletion); x3, x3-4 = 3+ copies (duplication); hmz = region of homozygosity

**Additional Information, Online Supplement 1**

Journal: Pediatric Cardiology

Title: Abnormal Microarray, Clinical Outcomes and Surgical Risk Scores in Young Children with Cardiac Disease

Authors: Kelsey McAfee, BA; Will T. Rosenow, MS; Sara Cherny, MS CGC; Catherine A. Collins, MD; Lauren C. Balmert, PhD; Gregory Webster, MD, MPH

Corresponding Author: Gregory Webster, Division of Cardiology, Ann and Robert H. Lurie Children's Hospital of Chicago, Northwestern University Feinberg School of Medicine, [rgwebster@luriechildrens.org](mailto:rgwebster@luriechildrens.org)
